# Supplementary material
Source: PubMed Central journal article supplement (PMC7677869)
Supplement: jamaotolaryngolheadnecksurg-e204352-s001.pdf [file jamaotolaryngolheadnecksurg-e204352-s001.pdf]

## Supplementary Online Content

Paulsen AJ, Fischer ME, Pinto A, et al. Incidence of hearing impairment and changes in pure-tone average across generations. *JAMA Otolaryngol Head Neck Surg*. Published online November 19, 2020. doi:10.1001/jamaoto.2020.4352

**eTable 1.** Age, Sex, and Generation by Inclusion Status

**eFigure.** Baseline Age by Generation, Defined by Birth Year

**eTable 2.** Sex-stratified Sensitivity Analyses of Incident Hearing Impairment and PTA Change (per 5 Years) by Generation of Birth

**This supplementary material has been provided by the authors to give readers additional information about their work.**

|                          | Included     | Excluded <sup>a</sup> |
|--------------------------|--------------|-----------------------|
| N                        | 3651         | 675                   |
| Age (range)              | 53.1 (22-86) | 54.2 (21-86)          |
| Women, N (%)             | 2255 (61.8)  | 421 (62.4)            |
| Generation, N (%)        |              |                       |
| Greatest (1901-1924)     | 291 (7.8)    | 97 (14.4)             |
| Silent (1925-1945)       | 1499 (41.1)  | 222 (32.9)            |
| Baby Boom (1946-1964)    | 1372 (37.6)  | 240 (35.6)            |
| Generation X (1965-1984) | 489 (13.4)   | 116 (17.2)            |

**eTable 1.** Age, Sex, and Generation by Inclusion Status

<sup>a</sup> Exclusion due to lack of necessary follow-up examinations

eFigure. Baseline age by generation, defined by birth year.<sup>a</sup>

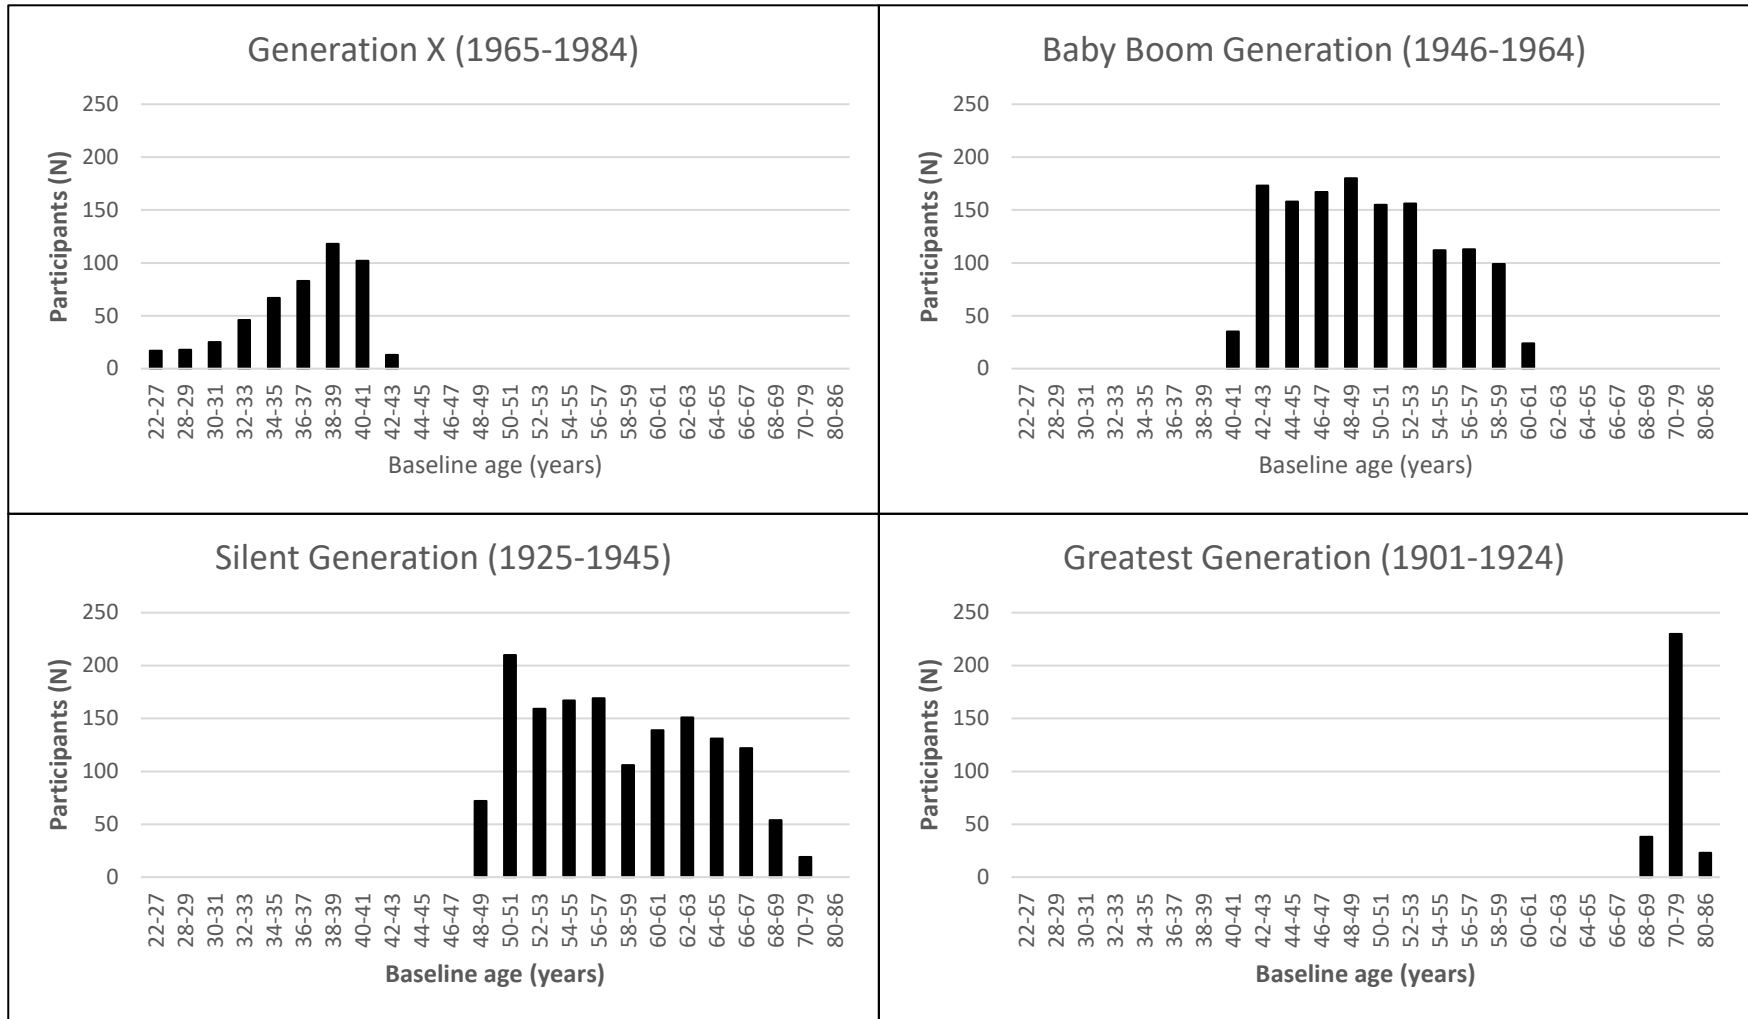

<sup>a</sup> Age grouped to ensure ≥ 10 participants per observed age.

|                              | Women              | Men               |
|------------------------------|--------------------|-------------------|
| 5-year incidence             | RR (95% CI)        |                   |
| Per generation               | 0.78 (0.60, 1.03)  | 0.80 (0.60, 1.05) |
| Silent Generation            | 0.73 (0.51, 1.07)  | 0.78 (0.53, 1.16) |
| Baby Boom Generation         | 0.61 (0.36, 1.06)  | 0.62 (0.35, 1.10) |
| Generation X                 | 0.46 (0.11, 1.86)  | 0.54 (0.20, 1.46) |
| 10-year cumulative incidence | HR (95% CI)        |                   |
| Per generation               | 0.88 (0.70, 1.12)  | 0.86 (0.68, 1.08) |
| Silent Generation            | 0.82 (0.59, 1.13)  | 0.73 (0.47, 1.13) |
| Baby Boom Generation         | 0.77 (0.48, 1.25)  | 0.62 (0.36, 1.07) |
| Generation X                 | 0.66 (0.23, 1.88)  | 0.69 (0.29, 1.61) |
| PTA change per 5-years       | PTA dBHL (p-value) |                   |
| Greatest Generation          | 7.28 (reference)   | 6.41 (reference)  |
| Silent Generation            | 3.26 (<0.0001)     | 3.52 (<0.0001)    |
| Baby Boom Generation         | 3.25 (<0.0001)     | 3.49 (<0.0001)    |
| Generation X                 | 2.05 (<0.0001)     | 2.66 (<0.0001)    |

**eTable 2.** Sex-stratified Sensitivity Analyses of Incident Hearing Impairment and PTA Change (per 5 Years) by Generation of Birth

Abbreviations: CI, confidence interval; dBHL, decibels hearing level; HR, hazard ratio; PTA pure tone average; RR, relative risk,
